# Supplementary material
Source: publisher figshare collection journal article supplement (https://rs.figshare.com/ndownloader/files/17418722)
Supplement: Supplementary file 1 [file 17418722]

## Sheet: metadata
There are 10 traits on one sheet and 2 traits on the other sheet (two separate groups of plants were used)
Orange = plant traits, green = leaf traits
The column headings in dark colours are the ones we used and reported (6 leaf and 6 plant). The lighter ones are data we used to calculate some of the dark ones.

## Sheet: 10 traits big pots
Plant individual ID	Population type	Country name	Population name	Maternal line ID	All popn code Arniston = 1 Treachery = 2 Wairo = 3 Narooma = 4 Mallacoota = 5	Aus popn code Treachery = 2 Wairo = 3 Narooma = 4 Mallacoota = 5	Plant length (mm)	Plant height (mm)	Plant growth form (height/length)	Above-ground biomass at senescence (g)	Leaf area with petiole (cm2)	Leaf area without petiole (cm2)	Leaf perimeter without petiole (cm)	Leaf shape (without petiole) (perim√area)	Leaf dry weight (mg)	Leaf fresh weight (g)	SLA (m2/kg)	LMA (g/m2)	log10(SLA)	Leaf thickness 1 (mm)	Leaf thickness 2 (mm)	Leaf thickness 3 (mm)	Average leaf thickness (mm)	Leaf density (ug/mm3)	LDMC (mg/g)	Notes
A-5+A	Source	South Africa	Arniston	A5	1		304	216	0.710526	43.0604	27.515	22.003	21.658	4.61719	223.6	3.07	12.3055	81.2648	1.0901	0.78	0.9	0.76	0.813333	99.9157	72.8339
A-5+L	Source	South Africa	Arniston	A5	1		306	111	0.362745		28.689	23.232	19.057	3.95377	163.5	3.37	17.5468	56.9905	1.2442	0.78	0.75	0.79	0.773333	73.6946	48.5163
A-5+M	Source	South Africa	Arniston	A5	1		174	78	0.448276		10.815	9.24	13.415	4.41321	34	1.04	31.8088	31.4378	1.50255	0.81	1.08	0.85	0.913333	34.421	32.6923
A-5+MZ	Source	South Africa	Arniston	A5	1		296	165	0.557432	19.8973	29.906	23.19	20.896	4.33923	211.6	3.55	14.1333	70.755	1.15024	0.5	0.51	0.52	0.51	138.735	59.6056
A-5+N	Source	South Africa	Arniston	A5	1		204	139	0.681373		25.914	23.313	22.626	4.68607	130	2.57	19.9338	50.1659	1.29959	0.64	0.74	0.65	0.676667	74.1368	50.5837
A-5+W	Source	South Africa	Arniston	A5	1		193	70	0.362694		9.516	7.135	11.385	4.26222	42.2	0.96	22.5498	44.3464	1.35314	0.83	0.8	0.83	0.82	54.0809	43.9583
A-5b+A	Source	South Africa	Arniston	A5	1		384	145	0.377604	16.4046	19.537	16.899	16.677	4.05684	115.3	2.15	16.9445	59.0162	1.22903	0.85	0.92	0.85	0.873333	67.5758	53.6279
extra A-7	Source	South Africa	Arniston	A7	1						46.941	41.25	40.091	6.24216	235.6	4.96	19.924	50.1907	1.29938	0.42	0.43	0.43	0.426667	117.634	47.5
A-7+A	Source	South Africa	Arniston	A7	1					14.36	15.621	12.015	16.505	4.76161	55.4	1.52	28.1968	35.4651	1.4502	0.42	0.64	0.64	0.566667	62.5854	36.4474
A-7+L	Source	South Africa	Arniston	A7	1						41.097	33.456	30.344	5.24609	168.9	4.64	24.3321	41.0979	1.38618	0.62	0.65	0.6	0.623333	65.9324	36.4009
A-7+M	Source	South Africa	Arniston	A7	1						21.884	17.891	18.396	4.34917	71.4	2.32	30.6499	32.6266	1.48643	0.76	0.75	0.74	0.75	43.5021	30.7759
A-7+MZ	Source	South Africa	Arniston	A7	1					11.84	14.177	10.092	14.296	4.50014	54.9	1.53	25.8233	38.7247	1.41201	0.5	0.6	0.5	0.533333	72.6088	35.8824
A-7+N	Source	South Africa	Arniston	A7	1						15.14	12.507	16.889	4.77559	40.5	1.54	37.3827	26.7503	1.57267	0.59	0.52	0.55	0.553333	48.344	26.2987
A-7+W	Source	South Africa	Arniston	A7	1						39	31.488	32.912	5.86519	186	4.71	20.9677	47.6923	1.32155	0.6	0.65	0.62	0.623333	76.5117	39.4904
A-7b+A	Source	South Africa	Arniston	A7	1					26.7333	35.355	30.444	31.688	5.74307	125.4	3.85	28.1938	35.4688	1.45015	0.56	0.61	0.53	0.566667	62.592	32.5714
extra A-8	Source	South Africa	Arniston	A8	1					34.7518	38.679	35.682	32.168	5.38517	147.9	4.02	26.1521	38.2378	1.41751	0.55	0.62	0.55	0.573333	66.6938	36.791
A-8+A	Source	South Africa	Arniston	A8	1		316	199	0.629747	37.8253	44.671	38.66	29.536	4.7503	347.4	5.4	12.8587	77.7686	1.1092	0.78	0.82	0.78	0.793333	98.0276	64.3333
A-8+L	Source	South Africa	Arniston	A8	1		381	221	0.580052		56.114	50.337	30.882	4.35273	308.7	6.33	18.1775	55.013	1.25953	0.64	0.77	0.59	0.666667	82.5195	48.7678
A-8+M	Source	South Africa	Arniston	A8	1		329	178	0.541033		46.628	42.008	32.416	5.00142	299.4	5.18	15.5738	64.2103	1.19239	0.58	0.68	0.72	0.66	97.2884	57.7992
A-8+MZ	Source	South Africa	Arniston	A8	1		297	79	0.265993	27.1362	15.331	12.901	16.407	4.56791	51.2	1.52	29.9434	33.3964	1.4763	0.6	0.66	0.68	0.646667	51.6439	33.6842
A-8+N	Source	South Africa	Arniston	A8	1		218	145	0.665138		40.844	35.288	27.232	4.58423	261	4.39	15.649	63.9017	1.19449	0.64	0.72	0.7	0.686667	93.0607	59.4533
A-8+W	Source	South Africa	Arniston	A8	1		190	65	0.342105		11.897	10.059	14.494	4.56994	45.6	1.1	26.0899	38.329	1.41647	0.59	0.7	0.6	0.63	60.8397	41.4545
A-8b	Source	South Africa	Arniston	A8	1		267	191	0.715356	21.65	21.233	18.398	17.423	4.06198	91.3	2.24	23.2563	42.9991	1.36654	0.68	0.7	0.65	0.676667	63.5455	40.7589
A-8b+A	Source	South Africa	Arniston	A8	1					29.6	59.277	53.121	39.282	5.38965	347.2	7.01	17.0729	58.5725	1.23231	0.53	0.71	0.5	0.58	100.987	49.5292
A-9+A	Source	South Africa	Arniston	A9	1		287	183	0.637631	23.41	28.89	26.211	33.102	6.46565	236.2	3.2	12.2312	81.7584	1.08747	0.82	0.82	0.81	0.816667	100.112	73.8125
A-9+L	Source	South Africa	Arniston	A9	1						15.345	11.884	16.363	4.74659	45.5	1.51	33.7253	29.6514	1.52796	0.57	0.63	0.52	0.573333	51.7175	30.1325
A-9+M	Source	South Africa	Arniston	A9	1
A-9+MZ	Source	South Africa	Arniston	A9	1
A-9+N	Source	South Africa	Arniston	A9	1
A-9+W	Source	South Africa	Arniston	A9	1						12.505	9.529	13.832	4.48086	50.8	1.21	24.6161	40.6238	1.39122	0.7	0.68	0.72	0.7	58.0339	41.9835
A-9b+A	Source	South Africa	Arniston	A9	1
A-11+A	Source	South Africa	Arniston	A11	1		254	206	0.811024	27.9443	26.499	22.93	27.283	5.69758	199	2.98	13.3161	75.0972	1.12438	0.79	0.81	0.81	0.803333	93.482	66.7785
A-11+MZ	Source	South Africa	Arniston	A11	1
A-11b+A	Source	South Africa	Arniston	A11	1
A-13+A	Source	South Africa	Arniston	A13	1		245	136	0.555102	22.5091	14.952	13.159	17.485	4.82008	99.6	1.73	15.012	66.6132	1.17644	0.86	0.97	0.86	0.896667	74.2898	57.5723
A-13+L	Source	South Africa	Arniston	A13	1		363	242	0.666667		27.393	22.788	30.684	6.42775	224.4	3.03	12.2072	81.9187	1.08662	0.77	0.92	0.81	0.833333	98.3025	74.0594
A-13+M	Source	South Africa	Arniston	A13	1		323	193	0.597523		26.394	23.587	22.982	4.73207	179.1	3.1	14.737	67.8563	1.16841	0.85	0.95	0.85	0.883333	76.8185	57.7742
A-13+MZ	Source	South Africa	Arniston	A13	1		254	204	0.80315	49.89	42.294	38.963	44.437	7.11899	310.8	4.5	13.6081	73.4856	1.1338	0.76	0.86	0.77	0.796667	92.2413	69.0667
A-13+N	Source	South Africa	Arniston	A13	1		230	167	0.726087		45.28	38.618	38.945	6.26696	367	6.22	12.3379	81.0512	1.09124	0.94	1.07	0.94	0.983333	82.425	59.0032
A-13+W	Source	South Africa	Arniston	A13	1		326	223	0.684049		35.769	32.309	24.771	4.35795	200.9	4.28	17.8044	56.166	1.25053	0.66	0.68	0.6	0.646667	86.8546	46.9393
A-13b+A	Source	South Africa	Arniston	A13	1		264	183	0.693182	22.0046	33.578	28.985	27.743	5.15308	190.4	3.98	17.6355	56.7038	1.24639	0.6	0.89	0.6	0.696667	81.393	47.8392
A-14+A	Source	South Africa	Arniston	A14	1		310	72	0.232258	27.6925	19.875	17.814	18.914	4.48129	96.2	2.55	20.6601	48.4025	1.31513	0.6	0.59	0.56	0.583333	82.9757	37.7255
A-14+L	Source	South Africa	Arniston	A14	1
A-14+MZ	Source	South Africa	Arniston	A14	1					29.9798	26.429	21.596	19.882	4.27832	122.3	3.19	21.61	46.2749	1.33465	0.51	0.6	0.5	0.536667	86.2266	38.3386
A-14+N	Source	South Africa	Arniston	A14	1						11.572	8.531	14.4	4.93018	56.7	1.43	20.4092	48.9976	1.30983	0.69	0.69	0.67	0.683333	71.7038	39.6503
A-14+W	Source	South Africa	Arniston	A14	1
A-14b+A	Source	South Africa	Arniston	A14	1
A-15+A	Source	South Africa	Arniston	A15	1					19.2	33.767	28.61	27.029	5.05325	122.3	3.94	27.61	36.2188	1.44107	0.39	0.48	0.45	0.44	82.3154	31.0406
A-15+L	Source	South Africa	Arniston	A15	1						20.449	16.098	20.057	4.99896	76.7	2.23	26.661	37.5079	1.42588	0.44	0.6	0.45	0.496667	75.5194	34.3946
A-15+M	Source	South Africa	Arniston	A15	1						28.04	23.56	21.027	4.33201	150.1	3.79	18.6809	53.5307	1.2714	0.75	0.93	0.7	0.793333	67.4756	39.6042
A-15+MZ	Source	South Africa	Arniston	A15	1					10.9	5.695	4.188	9.514	4.649	20.4	0.46	27.9167	35.8209	1.44586	0.58	0.68	0.56	0.606667	59.0454	44.3478
A-15+N	Source	South Africa	Arniston	A15	1						12.785	9.077	14.162	4.7006	53.2	1.61	24.032	41.6113	1.38079	0.63	0.63	0.52	0.593333	70.1313	33.0435
A-15+W	Source	South Africa	Arniston	A15	1						30.659	25.066	24.992	4.99182	142.6	3.9	21.5	46.5116	1.33244	0.61	0.66	0.62	0.63	73.828	36.5641
A-15b+A	Source	South Africa	Arniston	A15	1					18.44	39.888	32.928	29.594	5.15728	174.1	5.08	22.911	43.6472	1.36004	0.64	0.69	0.59	0.64	68.1988	34.2717
extra A-17	Source	South Africa	Arniston	A17	1
A-17+A	Source	South Africa	Arniston	A17	1		289	164	0.567474	12.9189	24.903	21.839	26.654	5.70356	133.6	2.94	18.64	53.6482	1.27045	0.56	0.66	0.67	0.63	85.1558	45.4422
A-17+L	Source	South Africa	Arniston	A17	1		349	264	0.756447		36.318	31.082	38.865	6.97115	279.6	4.65	12.9893	76.9866	1.11358	0.73	0.78	0.7	0.736667	104.507	60.129
A-17+M	Source	South Africa	Arniston	A17	1		274	193	0.70438		41.47	35.918	46.825	7.81307	378.9	4.8	10.9448	91.3673	1.03921	0.82	0.82	0.9	0.846667	107.914	78.9375
A-17+MZ	Source	South Africa	Arniston	A17	1		230	139	0.604348	16.327	28.034	24.823	22.078	4.43131	150	3.16	18.6893	53.5065	1.27159	0.8	0.76	0.76	0.773333	69.1894	47.4684
A-17+N	Source	South Africa	Arniston	A17	1		256	112	0.4375		24.949	23.364	29.669	6.13803	154.3	2.57	16.1692	61.8462	1.20869	0.68	0.73	0.65	0.686667	90.0672	60.0389
A-17+W	Source	South Africa	Arniston	A17	1		149	35	0.234899		6.533	4.797	10.674	4.87352	27.1	0.64	24.107	41.4817	1.38214	0.72	0.66	0.7	0.693333	59.8294	42.3437
A-17b+A	Source	South Africa	Arniston	A17	1		334	139	0.416168	24.79	28.609	25.888	24.216	4.75941	152.4	3.65	18.7723	53.27	1.27352	0.58	0.96	0.56	0.7	76.0999	41.7534
extra A-18	Source	South Africa	Arniston	A18	1						46.124	41.354	41.522	6.45683	246	5.04	18.7496	53.3345	1.27299	0.52	0.58	0.53	0.543333	98.1616	48.8095
A-18+A	Source	South Africa	Arniston	A18	1		280	220	0.785714	37.8809	35.453	29.966	47.475	8.67263	190.3	4.4	18.6301	53.6767	1.27021	0.79	0.75	0.78	0.773333	69.4095	43.25
A-18+L	Source	South Africa	Arniston	A18	1		198	144	0.727273		26.16	23.732	27.705	5.6871	166.2	2.92	15.7401	63.5321	1.19701	0.84	0.84	0.83	0.836667	75.9348	56.9178
A-18+M	Source	South Africa	Arniston	A18	1		363	248	0.683196		36.724	32.806	34.047	5.94432	326.3	4.56	11.2547	88.852	1.05133	0.7	0.83	0.65	0.726667	122.273	71.557
A-18+MZ	Source	South Africa	Arniston	A18	1		372	161	0.432796		39.597	35.426	50.202	8.43451	212.5	4.16	18.6339	53.6657	1.2703	0.62	0.63	0.67	0.64	83.8526	51.0817
A-18+N	Source	South Africa	Arniston	A18	1		330	72	0.218182		23.586	19.185	20.156	4.60175	155.6	2.91	15.1581	65.9713	1.18064	0.79	0.8	0.78	0.79	83.508	53.4708
A-18+W	Source	South Africa	Arniston	A18	1		275	68	0.247273		22.487	19.333	19.178	4.36168	118.5	2.63	18.9764	52.6971	1.27821	0.83	0.86	0.84	0.843333	62.4867	45.057
A-18b+A	Source	South Africa	Arniston	A18	1		315	160	0.507937	31.7296	19.552	16.993	19.316	4.68578	157.2	2.27	12.4377	80.401	1.09474	1.07	1.04	1.07	1.06	75.85	69.2511
A-18	Source	South Africa	Arniston	A18	1						24.731	20.711	20.159	4.42964
A-19+A	Source	South Africa	Arniston	A19	1		336	106	0.315476	26.3096	30.235	25.637	22.735	4.49016	198.6	4.27	15.2241	65.6855	1.18253	0.71	0.91	0.68	0.766667	85.6767	46.5105
A-19+L	Source	South Africa	Arniston	A19	1		245	171	0.697959		24.233	20.5	24.924	5.50479	182.5	2.99	13.2784	75.3105	1.12314	0.98	0.97	0.94	0.963333	78.177	61.0368
A-19+M	Source	South Africa	Arniston	A19	1		236	141	0.597458		24.796	20.404	22.533	4.9884	165.9	3.39	14.9464	66.906	1.17454	1.1	1.18	0.99	1.09	61.3816	48.9381
A-19+MZ	Source	South Africa	Arniston	A19	1		340	30	0.0882353	12.7475	17.806	13.206	16.716	4.59988	79.8	2.79	22.3133	44.8164	1.34856	0.81	0.82	0.74	0.79	56.7296	28.6022
A-19+N	Source	South Africa	Arniston	A19	1						27.933	22.116	22.703	4.82759	144.1	4.6	19.3845	51.5877	1.28745	0.73	0.81	0.74	0.76	67.8786	31.3261
A-19+W	Source	South Africa	Arniston	A19	1		358	66	0.184358		32.751	29.536	30.797	5.66673	165.4	3.81	19.8011	50.5023	1.29669	0.65	0.8	0.67	0.706667	71.4655	43.4121
A-23+A	Source	South Africa	Arniston	A23	1
A-23+MZ	Source	South Africa	Arniston	A23	1
A-23b+A	Source	South Africa	Arniston	A23	1
A-24+A	Source	South Africa	Arniston	A24	1		240	139	0.579167	19.5442	17.175	14.65	15.52	4.05483	122.7	1.79	13.9976	71.441	1.14605	0.84	0.8	0.85	0.83	86.0736	68.5475
A-24+M	Source	South Africa	Arniston	A24	1						34.831	32.05	28.352	5.00806	174.6	4.1	19.949	50.1278	1.29992	0.57	0.67	0.56	0.6	83.5463	42.5854
A-24+MZ	Source	South Africa	Arniston	A24	1
A-24+W	Source	South Africa	Arniston	A24	1						35.1	30.098	34.459	6.28107	247.2	5.02	14.199	70.4274	1.15226	0.75	0.96	0.82	0.843333	83.5107	49.243
A-24b+A	Source	South Africa	Arniston	A24	1
extra A-37	Source	South Africa	Arniston	A37	1					24.81	16.851	14.69	15.587	4.06679	76.1	1.85	22.1432	45.1605	1.34524	0.56	0.79	0.64	0.663333	68.0812	41.1351
A-37+A	Source	South Africa	Arniston	A37	1		196	113	0.576531		16.098	14.442	15.727	4.1384	74.6	1.47	21.5791	46.3412	1.33403	0.68	0.72	0.68	0.693333	66.8382	50.7483
A-37+L	Source	South Africa	Arniston	A37	1		158	85	0.537975		8.411	7.469	11.55	4.22621	42.1	0.81	19.9786	50.0535	1.30057	0.72	0.73	0.69	0.713333	70.1685	51.9753
A-37+M	Source	South Africa	Arniston	A37	1		276	170	0.615942		36.143	32.587	24.979	4.37575	228.8	4.16	15.7968	63.3041	1.19857	0.69	0.68	0.64	0.67	94.4837	55
A-37+N	Source	South Africa	Arniston	A37	1		205	168	0.819512		29.72	28.043	29.961	5.65775	176.3	2.92	16.8576	59.3203	1.2268	0.6	0.72	0.66	0.66	89.8793	60.3767
A-37+W	Source	South Africa	Arniston	A37	1		145	54	0.372414		4.099	3.409	8.954	4.84957	16.2	0.33	25.3025	39.5218	1.40316	0.64	0.75	0.69	0.693333	57.0026	49.0909
A-37b	Source	South Africa	Arniston	A37	1		224	121	0.540179		28.445	24.919	26.587	5.32604	170.6	3.71	16.6735	59.9754	1.22203	1.2	1.1	1.08	1.12667	53.2326	45.9838
A-37b+A	Source	South Africa	Arniston	A37	1		170	128	0.752941	33.8908	35.184	31.286	36.179	6.46817	223.5	3.95	15.7423	63.5232	1.19707	0.71	0.79	0.69	0.73	87.0181	56.5823
A-39+A	Source	South Africa	Arniston	A39	1
A-39+L	Source	South Africa	Arniston	A39	1
A-39+M	Source	South Africa	Arniston	A39	1
A-39+MZ	Source	South Africa	Arniston	A39	1
A-39+N	Source	South Africa	Arniston	A39	1
A-39+W	Source	South Africa	Arniston	A39	1
A-39b+A	Source	South Africa	Arniston	A39	1
A-48+A	Source	South Africa	Arniston	A48	1		305	196	0.642623	26.6685	26.435	23.59	30.994	6.38137	213.1	3.06	12.405	80.6128	1.0936	0.84	0.88	0.8	0.84	95.9676	69.6405
A-48+L	Source	South Africa	Arniston	A48	1						29.863	25.815	26.302	5.1767	203.3	3.68	14.6891	68.0776	1.167	0.87	0.96	0.86	0.896667	75.9229	55.2446
A-48+M	Source	South Africa	Arniston	A48	1		230	163	0.708696		23.472	20.215	20.236	4.50078	147.1	3.09	15.9565	62.6704	1.20294	0.89	0.98	0.92	0.93	67.3875	47.6052
A-48+MZ	Source	South Africa	Arniston	A48	1		236	154	0.652542	28.31	25.556	23.179	22.032	4.57622	125.2	2.56	20.4121	48.9905	1.30989	0.55	0.56	0.59	0.566667	86.4537	48.9062
A-48+N	Source	South Africa	Arniston	A48	1		219	61	0.278539		16.511	14.688	17.224	4.4942	77.6	1.84	21.2771	46.999	1.32791	0.71	0.79	0.78	0.76	61.8408	42.1739
A-48+W	Source	South Africa	Arniston	A48	1		340	203	0.597059		45.686	42.178	38.157	5.87532	274.4	5.67	16.6494	60.0622	1.2214	0.89	0.87	0.86	0.873333	68.7735	48.3951
extra A-49	Source	South Africa	Arniston	A49	1					27.81	39.773	34.912	39.056	6.60998	243.9	4.84	16.3071	61.323	1.21238	0.57	0.77	0.7	0.68	90.1809	50.3926
A-49+A	Source	South Africa	Arniston	A49	1		366	87	0.237705	21.5024	43.823	36.599	39.138	6.4694	188.8	5.33	23.2113	43.0824	1.3657	0.4	0.49	0.45	0.446667	96.4531	35.4221
A-49+L	Source	South Africa	Arniston	A49	1		164	93	0.567073		10.008	8.33	12.26	4.24784	53.2	1.22	18.812	53.1575	1.27444	0.83	0.92	0.73	0.826667	64.3034	43.6066
A-49+M	Source	South Africa	Arniston	A49	1		288	159	0.552083		22.665	19.577	22.472	5.07889	137	2.53	16.5438	60.4456	1.21864	0.72	0.72	0.72	0.72	83.9523	54.1502
A-49+MZ	Source	South Africa	Arniston	A49	1		275	149	0.541818		26.625	24.584	24.81	5.00381	126	2.93	21.131	47.3239	1.32492	0.65	0.6	0.62	0.623333	75.9208	43.0034
A-49+N	Source	South Africa	Arniston	A49	1		237	150	0.632911		27.158	24.99	24.18	4.83697	177.7	3.13	15.2831	65.4319	1.18421	0.72	0.76	0.83	0.77	84.9765	56.7732
A-49+W	Source	South Africa	Arniston	A49	1		295	157	0.532203		38.773	34.783	27.254	4.62111	239.4	5.43	16.1959	61.744	1.20941	0.82	0.93	0.83	0.86	71.7953	44.0884
A-49b+A	Source	South Africa	Arniston	A49	1		180	106	0.588889		24.354	21.246	24.628	5.34307	230.7	2.93	10.5566	94.7278	1.02352	0.79	0.81	0.84	0.813333	116.469	78.7372
A-50+A	Source	South Africa	Arniston	A50	1		300	146	0.486667	15.15	18.426	15.279	16.845	4.30947	85.1	1.94	21.6522	46.1847	1.3355	0.65	0.68	0.65	0.66	69.9769	43.866
A-50+L	Source	South Africa	Arniston	A50	1		391	71	0.181586		24.319	20.396	18.727	4.14663	138.6	2.88	17.5462	56.9925	1.24418	0.74	0.7	0.75	0.73	78.0719	48.125
A-50+M	Source	South Africa	Arniston	A50	1		302	195	0.645695		41.331	37.182	30.729	5.03944	235.1	5.36	17.5802	56.8822	1.24502	0.67	0.75	0.66	0.693333	82.0417	43.8619
A-50+MZ	Source	South Africa	Arniston	A50	1		320	96	0.3	34.75	28.524	27.19	30.425	5.8348	135.4	2.86	21.0665	47.4688	1.32359	0.55	0.76	0.64	0.65	73.0289	47.3427
A-50+N	Source	South Africa	Arniston	A50	1						36.531	31.559	39.053	6.95173	218.4	4.3	16.7266	59.7848	1.22341	0.45	0.51	0.45	0.47	127.202	50.7907
A-50+W	Source	South Africa	Arniston	A50	1		205	123	0.6		21.326	18.241	19.984	4.67905	133.5	2.51	15.9745	62.5996	1.20343	0.75	0.81	0.72	0.76	82.368	53.1873
A-50b	Source	South Africa	Arniston	A50	1		321	209	0.65109	27.1971	33.631	29.292	32.285	5.96522	245.1	4.28	13.7213	72.8792	1.1374	0.85	0.8	0.8	0.816667	89.2398	57.2664
A-50b+A	Source	South Africa	Arniston	A50	1		354	237	0.669492	48.8673	36.479	32.961	34.784	6.0587	224.1	3.57	16.278	61.4326	1.2116	0.54	0.59	0.52	0.55	111.696	62.7731
C-9+A	Source	South Africa	Arniston	C9	1					32.9849	44.018	37.727	25.678	4.18057	273.1	4.86	16.1179	62.0428	1.20731	0.42	0.61	0.4	0.476667	130.16	56.1934
C-9b+A	Source	South Africa	Arniston	C9	1
C-18+A	Source	South Africa	Arniston	C18	1					47.1423	45.395	39.515	38.989	6.20242	286.8	5.92	15.8281	63.1788	1.19943	0.78	0.71	0.75	0.746667	84.6144	48.4459
C-18+L	Source	South Africa	Arniston	C18	1						39.296	30.562	22.801	4.12442	203.3	5.95	19.3291	51.7355	1.28621	0.73	0.77	0.68	0.726667	71.1957	34.1681
C-18+M	Source	South Africa	Arniston	C18	1						12.943	9.587	14.237	4.59809	60.8	1.57	21.2878	46.9752	1.32813	0.65	0.64	0.62	0.636667	73.783	38.7261
C-18+N	Source	South Africa	Arniston	C18	1
C-18+W	Source	South Africa	Arniston	C18	1						20.395	16.564	16.143	3.96645	87.8	2.19	23.2289	43.0498	1.36603	0.68	0.72	0.68	0.693333	62.091	40.0913
C-18b+A	Source	South Africa	Arniston	C18	1
extra C-26	Source	South Africa	Arniston	C26	1					28.8335	20.217	16.305	16.905	4.18654	88.6	2.33	22.8183	43.8245	1.35828	0.7	0.72	0.55	0.656667	66.7378	38.0258
C-26+A	Source	South Africa	Arniston	C26	1		344	212	0.616279	18.65	36.294	30.887	36.185	6.5109	286.5	4.51	12.6681	78.9387	1.10271	0.9	1	0.85	0.916667	86.1149	63.5255
C-26+L	Source	South Africa	Arniston	C26	1		332	218	0.656627		40.711	35.334	25.943	4.36439	182.5	3.73	22.3074	44.8282	1.34845	0.55	0.56	0.63	0.58	77.29	48.9276
C-26+M	Source	South Africa	Arniston	C26	1		282	176	0.624113		21.135	18.157	18.725	4.3944	127.7	2.35	16.5505	60.4211	1.21881	0.74	0.77	0.82	0.776667	77.7954	54.3404
C-26+N	Source	South Africa	Arniston	C26	1		300	203	0.676667		48.389	45.473	43.303	6.42157	334.1	6.78	14.4834	69.0446	1.16087	0.98	1.08	1.02	1.02667	67.2513	49.2773
C-26+W	Source	South Africa	Arniston	C26	1		393	79	0.201018		43.796	38.962	38.49	6.16634	274.7	6.01	15.9432	62.7226	1.20258	0.68	0.78	0.72	0.726667	86.3155	45.7072
C-26b+A	Source	South Africa	Arniston	C26	1		270	205	0.759259	33.2533	33.032	26.75	21.923	4.23875	254.4	3.97	12.9843	77.0162	1.11342	0.72	0.75	0.76	0.743333	103.609	64.0806
C-27+A	Source	South Africa	Arniston	C27	1		197	124	0.629442	30.6578	21.89	19.098	20.196	4.62138	88.9	2.54	24.6232	40.6122	1.39134	0.52	0.55	0.54	0.536667	75.6748	35
C-27+L	Source	South Africa	Arniston	C27	1						31.685	24.923	20.467	4.09972	140.5	3.86	22.5516	44.3427	1.35318	0.55	0.57	0.51	0.543333	81.6124	36.399
C-27+M	Source	South Africa	Arniston	C27	1						35.364	28.143	22.836	4.30462	233.7	4.88	15.1322	66.0842	1.1799	0.67	0.92	0.65	0.746667	88.5056	47.8893
C-27+N	Source	South Africa	Arniston	C27	1						40.877	33.923	36.235	6.2213	235.5	5.06	17.3575	57.6119	1.23949	0.59	0.64	0.59	0.606667	94.9646	46.5415
C-27+W	Source	South Africa	Arniston	C27	1						18.408	15.081	17.845	4.59517	76	2.25	24.2211	41.2864	1.38419	0.82	0.81	0.76	0.796667	51.8239	33.7778
C-27b+A	Source	South Africa	Arniston	C27	1
L-1+A	Introduced	Australia	Treachery beach	L1	2	2	336	149	0.443452		11.109	9.298	14.644	4.80247	66.7	1.44	16.6552	60.0414	1.22155	0.82	0.84	0.82	0.826667	72.6307	46.3194
L-1+L	Introduced	Australia	Treachery beach	L1	2	2	301	176	0.584718	26.0216	21.993	19.937	20.653	4.62544	145	2.88	15.1676	65.9301	1.18092	0.91	1.02	0.98	0.97	67.9691	50.3472
L-1+M	Introduced	Australia	Treachery beach	L1	2	2	227	59	0.259912		9.497	8.225	13.7	4.77697	40.1	0.97	23.6833	42.2239	1.37444	0.7	0.82	0.72	0.746667	56.5498	41.3402
L-1+N	Introduced	Australia	Treachery beach	L1	2	2					20.717	17.17	18.94	4.57083	114.5	2.65	18.0934	55.2686	1.25752	0.71	0.83	0.66	0.733333	75.3663	43.2075
L-1+W	Introduced	Australia	Treachery beach	L1	2	2					12.542	10.439	14.951	4.62744	57.8	1.49	21.699	46.0852	1.33644	0.53	0.68	0.72	0.643333	71.635	38.7919
L-4+A	Introduced	Australia	Treachery beach	L4	2	2	440	61	0.138636		15.865	13.187	16.699	4.59851	91	2.08	17.4341	57.359	1.2414	0.74	1	0.88	0.873333	65.6782	43.75
L-4+L	Introduced	Australia	Treachery beach	L4	2	2	421	184	0.437055	41.4653	24.557	23.159	20.911	4.34525	171.6	3.29	14.3106	69.8782	1.15566	0.85	0.85	0.69	0.796667	87.7133	52.1581
L-4+M	Introduced	Australia	Treachery beach	L4	2	2	274	165	0.60219		24.24	20.622	19.79	4.35793	181.8	3.05	13.3333	75	1.12494	0.85	1.02	0.92	0.93	80.6452	59.6066
L-4+N	Introduced	Australia	Treachery beach	L4	2	2					14.942	12.861	16.034	4.471	76.9	2.08	19.4304	51.4657	1.28848	0.72	1.02	0.84	0.86	59.8438	36.9712
L-4+W	Introduced	Australia	Treachery beach	L4	2	2	406	61	0.150246		21.244	18.373	19.514	4.55257	123.7	2.67	17.1738	58.2282	1.23487	0.58	0.79	0.74	0.703333	82.7889	46.3296
L-5+A	Introduced	Australia	Treachery beach	L5	2	2	346	83	0.239884						58.5	1.5				0.85	0.86	0.74	0.816667		39	split leaf - removed area and perim measurements
L-5+L	Introduced	Australia	Treachery beach	L5	2	2	374	198	0.529412	35.3178	20.603	18.286	19.321	4.51825	159.5	2.73	12.9172	77.4159	1.11117	0.81	0.94	0.74	0.83	93.2722	58.4249
L-5+M	Introduced	Australia	Treachery beach	L5	2	2	451	118	0.261641		24.936	21.423	20.712	4.47489	135.5	3.74	18.403	54.3391	1.26489	0.88	1	0.8	0.893333	60.8274	36.2299
L-5+N	Introduced	Australia	Treachery beach	L5	2	2	417	160	0.383693		21.245	18.945	18.104	4.15937	116.1	2.55	18.2989	54.6482	1.26242	0.88	1.1	0.85	0.943333	57.9309	45.5294
L-5+W	Introduced	Australia	Treachery beach	L5	2	2
L-6+A	Introduced	Australia	Treachery beach	L6	2	2	373	59	0.158177		10.954	8.355	12.844	4.44352	53	1.26	20.6679	48.3842	1.3153	0.68	0.82	0.62	0.706667	68.4681	42.0635
L-6+L	Introduced	Australia	Treachery beach	L6	2	2	330	194	0.587879	36.6526	24.095	19.865	18.856	4.23063	187.1	2.87	12.8781	77.651	1.10985	0.86	1.09	0.85	0.933333	83.1975	65.1916
L-6+M	Introduced	Australia	Treachery beach	L6	2	2	251	131	0.521912		13.927	11.945	15.225	4.40519	74.3	1.53	18.7443	53.3496	1.27287	0.85	1.1	0.9	0.95	56.1575	48.5621
L-6+N	Introduced	Australia	Treachery beach	L6	2	2	425	228	0.536471		25.934	22.689	21.098	4.42928	156.6	2.96	16.5607	60.3841	1.21908	0.51	0.7	0.7	0.636667	94.8441	52.9054
L-6+W	Introduced	Australia	Treachery beach	L6	2	2					14.373	11.38	15.003	4.44741	80.9	1.86	17.7664	56.2861	1.2496	0.67	0.71	0.65	0.676667	83.1814	43.4946
L-7+A	Introduced	Australia	Treachery beach	L7	2	2	410	74	0.180488		24.216	20.545	21.942	4.84087	192.7	4.22	12.5667	79.5755	1.09922	0.78	0.9	0.77	0.816667	97.4394	45.6635
L-7+L	Introduced	Australia	Treachery beach	L7	2	2	330	164	0.49697	35.0559	19.264	16.782	17.279	4.2179	151.7	2.27	12.6987	78.7479	1.10376	0.88	1.01	0.85	0.913333	86.2204	66.8282
L-7+M	Introduced	Australia	Treachery beach	L7	2	2	261	60	0.229885		12.191	9.899	13.682	4.34864	54.7	1.4	22.287	44.8692	1.34805	1.06	1.08	1.06	1.06667	42.0648	39.0714
L-7+N	Introduced	Australia	Treachery beach	L7	2	2	211	96	0.454976		6.606	5.727	10.723	4.48077	27.6	0.61	23.9348	41.7802	1.37903	0.79	1.08	0.8	0.89	46.944	45.2459
L-7+W	Introduced	Australia	Treachery beach	L7	2	2	403	179	0.444169		18.675	16.082	17.06	4.25411		2.12				0.8	1.06	0.74	0.866667
L-8+A	Introduced	Australia	Treachery beach	L8	2	2	354	144	0.40678		21.668				85.1	2.36	25.4618	39.2745	1.40589	0.67	0.87	0.7	0.746667	52.5998	36.0593
L-8+L	Introduced	Australia	Treachery beach	L8	2	2	311	144	0.463023	31.0709	25.18	21.406	21.044	4.54842	116.2	3.31	21.6695	46.1477	1.33585	0.74	0.88	0.64	0.753333	61.2581	35.1057
L-11+A	Introduced	Australia	Treachery beach	L11	2	2	342	141	0.412281		23.286	19.877	19.858	4.4541	119.6	2.98	19.4699	51.3613	1.28936	0.85	0.88	0.82	0.85	60.4251	40.1342
L-11+L	Introduced	Australia	Treachery beach	L11	2	2	335	116	0.346269		22.113	19.807	19.172	4.30783	123.3	2.81	17.9343	55.7591	1.25368	0.65	0.75	0.71	0.703333	79.2783	43.879
L-12+A	Introduced	Australia	Treachery beach	L12	2	2	419	91	0.217184		13.957	11.581	15.824	4.6499	73	1.47	19.1192	52.3035	1.28147	0.7	0.75	0.7	0.716667	72.9816	49.6599
L-12+L	Introduced	Australia	Treachery beach	L12	2	2	320	89	0.278125	22.0516	13.5	11.221	13.976	4.17222	86.5	1.61	15.6069	64.0741	1.19332	1.03	1	1.05	1.02667	62.4098	53.7267
L-13+A	Introduced	Australia	Treachery beach	L13	2	2	306	161	0.526144		23.639	20.494	19.49	4.30525		3.53				1.03	1.26	1.06	1.11667
L-13+L	Introduced	Australia	Treachery beach	L13	2	2	350	79	0.225714	15.6187	11.562	9.251	13.543	4.45267	52.3	1.35	22.1071	45.2344	1.34453	0.8	0.95	0.78	0.843333	53.6376	38.7407
L-14+A	Introduced	Australia	Treachery beach	L14	2	2	190	114	0.6		9.044	8.017	12.073	4.26392	47.1	0.97	19.2017	52.0787	1.28334	0.9	0.92	0.84	0.886667	58.7354	48.5567
L-14+L	Introduced	Australia	Treachery beach	L14	2	2	255	101	0.396078	24.4199	10.897	8.623	13.304	4.53057	46	1.3	23.6891	42.2135	1.37455	0.86	1.07	0.75	0.893333	47.2539	35.3846
L-15+A	Introduced	Australia	Treachery beach	L15	2	2	381	106	0.278215		20.43	17.306	17.779	4.27375	114.5	2.53	17.8428	56.045	1.25146	0.72	1.1	0.8	0.873333	64.1737	45.2569
L-15+L	Introduced	Australia	Treachery beach	L15	2	2	344	110	0.319767	34.9743	28.815	24.684	21.126	4.25216	179.6	3.9	16.044	62.3286	1.20531	0.76	1.09	0.84	0.896667	69.5115	46.0513
L-16+A	Introduced	Australia	Treachery beach	L16	2	2	371	66	0.177898		19.481	15.74	17.219	4.34016	81.5	2.11	23.9031	41.8356	1.37845	0.78	0.83	0.78	0.796667	52.5133	38.6256
L-16+L	Introduced	Australia	Treachery beach	L16	2	2	392	189	0.482143	33.2241	21.834	19.216	18.738	4.27456	168.5	2.64	12.9579	77.1732	1.11253	0.9	1	0.92	0.94	82.0992	63.8258
L-17+A	Introduced	Australia	Treachery beach	L17	2	2	423	120	0.283688		20.206	17.221	18.378	4.42863	116.8	2.46	17.2997	57.8046	1.23804	0.63	0.8	0.66	0.696667	82.9731	47.4797
L-17+L	Introduced	Australia	Treachery beach	L17	2	2	180	92	0.511111	7.36					25.8	0.5				0.8	0.95	0.92	0.89		51.6
W-1+A	Introduced	Australia	Wairo beach	W1	3	3	469	113	0.240938		16.95	14.73	17.345	4.51932	90.4	1.65	18.75	53.3333	1.273	0.62	0.72	0.64	0.66	80.8081	54.7879
W-1+L	Introduced	Australia	Wairo beach	W1	3	3	342	136	0.397661		29.399	26.691	23.24	4.49835	151.1	3.53	19.4567	51.3963	1.28907	0.72	0.82	0.75	0.763333	67.3314	42.8045
W-1+M	Introduced	Australia	Wairo beach	W1	3	3	200	64	0.32		7.857	6.362	11.129	4.41224	30.5	0.77	25.7607	38.8189	1.41096	0.8	0.88	0.82	0.833333	46.5827	39.6104
W-1+N	Introduced	Australia	Wairo beach	W1	3	3	390	89	0.228205		27.816	25.354	22.488	4.46609	181.3	3.05	15.3425	65.1783	1.1859	0.89	1.05	0.75	0.896667	72.6896	59.4426
W-1+W	Introduced	Australia	Wairo beach	W1	3	3	434	109	0.251152		26.229	23.69	21.237	4.36326	142.6	2.91	18.3934	54.3673	1.26466	0.68	0.81	0.71	0.733333	74.1372	49.0034
W-2+A	Introduced	Australia	Wairo beach	W2	3	3	350	115	0.328571		21.842	18.657	20.134	4.66132	106.1	2.45	20.5862	48.5761	1.31358	0.78	0.94	0.68	0.8	60.7202	43.3061
W-2+L	Introduced	Australia	Wairo beach	W2	3	3	340	111	0.326471		19.705	16.537	20.045	4.92921	100.1	2.12	19.6853	50.7993	1.29414	0.6	0.71	0.6	0.636667	79.7895	47.217
W-2+M	Introduced	Australia	Wairo beach	W2	3	3	91	60	0.659341		3.53	2.706	7.867	4.78239	12.8	0.28	27.5781	36.2606	1.44056	0.79	0.91	0.79	0.83	43.6875	45.7143
W-2+N	Introduced	Australia	Wairo beach	W2	3	3	402	237	0.589552		30.479	27.754	23.72	4.50248	161.3	3.2	18.8958	52.9217	1.27637	0.7	0.84	0.76	0.766667	69.0283	50.4062
W-2+W	Introduced	Australia	Wairo beach	W2	3	3	273	96	0.351648	30.3346	9.846	8.124	13.455	4.72062	38	0.93	25.9105	38.5944	1.41348	0.75	0.76	0.8	0.77	50.1225	40.8602
W-3+A	Introduced	Australia	Wairo beach	W3	3	3	635	77	0.12126		14.852	10.914	15.996	4.84194	57.3	1.5	25.9197	38.5807	1.41363	0.49	0.61	0.51	0.536667	71.8894	38.2
W-3+L	Introduced	Australia	Wairo beach	W3	3	3	471	112	0.237792		26.102	23.896	21.834	4.46653	130.7	2.67	19.9709	50.0728	1.3004	0.68	0.72	0.75	0.716667	69.869	48.9513
W-3+M	Introduced	Australia	Wairo beach	W3	3	3	497	75	0.150905		22.262	19.521	21.135	4.78356	120.3	2.31	18.5054	54.0383	1.2673	0.67	0.64	0.58	0.63	85.775	52.0779
W-3+N	Introduced	Australia	Wairo beach	W3	3	3					21.693	18.701	20.489	4.73793	97.3	2.48	22.295	44.8532	1.34821	0.66	0.72	0.62	0.666667	67.2798	39.2339
W-3+W	Introduced	Australia	Wairo beach	W3	3	3	544	61	0.112132		16.166	13.886	18.182	4.87925	81	1.65	19.958	50.1052	1.30012	0.83	0.88	0.84	0.85	58.9472	49.0909
W-4+A	Introduced	Australia	Wairo beach	W4	3	3	404	185	0.457921		28.064	25.271	21.079	4.19313	187.2	3	14.9915	66.7047	1.17584	0.62	0.82	0.61	0.683333	97.6166	62.4
W-4+L	Introduced	Australia	Wairo beach	W4	3	3	414	121	0.292271		23.293	19.852	19.921	4.47104	119	2.68	19.5739	51.0883	1.29168	0.72	0.85	0.8	0.79	64.6687	44.403
W-4+M	Introduced	Australia	Wairo beach	W4	3	3	353	173	0.490085		31.74	27.804	24.264	4.6016	212.4	4.02	14.9435	66.9187	1.17445	0.8	0.84	0.8	0.813333	82.2771	52.8358
W-4+N	Introduced	Australia	Wairo beach	W4	3	3	196	93	0.47449		7.287	6.203	12.127	4.86914	34.4	0.6	21.1831	47.2074	1.32599	0.72	0.74	0.67	0.71	66.4892	57.3333
W-4+W	Introduced	Australia	Wairo beach	W4	3	3	299	146	0.488294	34.208	21.953	19.11	20.217	4.62473	147.5	2.51	14.8834	67.189	1.1727	0.8	0.85	0.85	0.833333	80.6268	58.7649
W-5+A	Introduced	Australia	Wairo beach	W5	3	3	377	79	0.209549		26.143	21.584	21.184	4.55976	108.7	2.98	24.0506	41.579	1.38113	0.76	0.84	0.76	0.786667	52.8547	36.4765
W-5+L	Introduced	Australia	Wairo beach	W5	3	3	355	158	0.44507		26.43	23.092	20.74	4.31597	178.7	3.3	14.7902	67.6126	1.16997	0.92	1.07	1	0.996667	67.8387	54.1515
W-5+M	Introduced	Australia	Wairo beach	W5	3	3	212	57	0.268868		7.509	6.077	12.129	4.92017	28.8	0.66	26.0729	38.354	1.41619	0.62	0.68	0.62	0.64	59.9281	43.6364
W-5+N	Introduced	Australia	Wairo beach	W5	3	3	363	162	0.446281		29.587	27.168	22.486	4.31403	235.7	3.81	12.5528	79.6634	1.09874	0.99	1.09	0.94	1.00667	79.1358	61.8635
W-5+W	Introduced	Australia	Wairo beach	W5	3	3	223	96	0.430493	25.26	18.678	16.594	18.316	4.4963	77.8	1.73	24.0077	41.6533	1.38035	0.61	0.71	0.81	0.71	58.6666	44.9711
W-6+A	Introduced	Australia	Wairo beach	W6	3	3	358	172	0.480447		16.642	14.463	16.055	4.22164	89.8	1.61	18.5323	53.9599	1.26793	0.73	0.92	0.68	0.776667	69.4762	55.7764
W-6+W	Introduced	Australia	Wairo beach	W6	3	3	234	46	0.196581	9.534	11.889	10.334	14.241	4.43003	50.1	1.08	23.7305	42.1398	1.37531	0.76	0.98	0.78	0.84	50.1664	46.3889
W-8+A	Introduced	Australia	Wairo beach	W8	3	3	413	162	0.392252		22.315	19.82	18.932	4.2525	127.2	2.39	17.5432	57.002	1.24411	0.68	0.89	0.71	0.76	75.0027	53.2218
W-8+W	Introduced	Australia	Wairo beach	W8	3	3	333	174	0.522523		30.06	26.931	23.464	4.52143	148.6	3.38	20.2288	49.4345	1.30597	0.82	0.9	0.8	0.84	58.8506	43.9645
W-9+A	Introduced	Australia	Wairo beach	W9	3	3	357	165	0.462185		24.369	21.506	19.457	4.19562	144.7	2.78	16.8411	59.3787	1.22637	0.92	1.01	0.93	0.953333	62.2854	52.0504
W-9+W	Introduced	Australia	Wairo beach	W9	3	3	344	218	0.633721		30.304	27.351	23.173	4.43094	190.7	3.68	15.8909	62.929	1.20115	0.76	0.94	0.92	0.873333	72.0561	51.8207
W-10+A	Introduced	Australia	Wairo beach	W10	3	3	331	139	0.41994		18.886	17.048	18.155	4.39703	99.3	1.98	19.0191	52.5786	1.27919	0.56	0.79	0.62	0.656667	80.069	50.1515
W-10+W	Introduced	Australia	Wairo beach	W10	3	3	440	171	0.388636		29.202	26.716	23.232	4.4947	138.4	2.95	21.0997	47.394	1.32428	0.69	0.88	0.69	0.753333	62.9124	46.9153
W-11+A	Introduced	Australia	Wairo beach	W11	3	3	379	71	0.187335		20.463	17.785	18.654	4.42329	99	2.23	20.6697	48.38	1.31533	0.77	0.93	0.78	0.826667	58.5242	44.3946
W-11+W	Introduced	Australia	Wairo beach	W11	3	3	488	229	0.469262		40.615	36.913	27.803	4.57617	243.6	5.74	16.6728	59.9778	1.22201	0.75	0.91	0.78	0.813333	73.7432	42.439
W-14+A	Introduced	Australia	Wairo beach	W14	3	3	315	103	0.326984		19.809	16.769	18.203	4.44518	72.8	2.29	27.2102	36.751	1.43473	0.84	0.93	0.83	0.866667	42.405	31.7904
W-14+W	Introduced	Australia	Wairo beach	W14	3	3	364	147	0.403846		22.139	19.745	19.248	4.33169	139.6	2.26	15.8589	63.0561	1.20027	0.72	0.72	0.65	0.696667	90.5112	61.7699
W-15+A	Introduced	Australia	Wairo beach	W15	3	3	415	191	0.460241		26.741	23.911	21.326	4.36125	168.6	2.96	15.8606	63.0493	1.20032	0.76	0.88	0.76	0.8	78.8116	56.9595
W-15+W	Introduced	Australia	Wairo beach	W15	3	3	342	184	0.538012		28.253	23.87	21.701	4.44174	178.7	3.5	15.8103	63.2499	1.19894	0.79	0.88	0.76	0.81	78.0863	51.0571
W-16+A	Introduced	Australia	Wairo beach	W16	3	3	350	139	0.397143		23.218	20.652	20.169	4.43816	161.5	2.58	14.3765	69.5581	1.15765	0.9	0.98	0.85	0.91	76.4375	62.5969
W-16+W	Introduced	Australia	Wairo beach	W16	3	3	392	163	0.415816		32.67	28.523	23.263	4.3558	226.4	4.02	14.4302	69.2991	1.15927	0.83	1.06	0.77	0.886667	78.1568	56.3184
W-17+A	Introduced	Australia	Wairo beach	W17	3	3	305	185	0.606557		32.518	29.298	25.42	4.69631	167.4	4.06	19.4253	51.4792	1.28837	0.75	0.9	0.85	0.833333	61.775	41.2315
W-17+W	Introduced	Australia	Wairo beach	W17	3	3	350	153	0.437143		20.851	18.584	18.862	4.3754	135.8	2.53	15.3542	65.1288	1.18623	0.63	0.71	0.68	0.673333	96.7259	53.6759
W-18+A	Introduced	Australia	Wairo beach	W18	3	3	246	41	0.166667		6.505	5.13	10.844	4.78774	25	0.59	26.02	38.432	1.41531	0.78	0.88	0.85	0.836667	45.9346	42.3729
W-18+W	Introduced	Australia	Wairo beach	W18	3	3	386	139	0.360104		18.648	16.402	17.206	4.24846	113.3	1.86	16.459	60.7572	1.2164	0.74	0.8	0.78	0.773333	78.5653	60.914
W-19+A	Introduced	Australia	Wairo beach	W19	3	3	430	169	0.393023		20.885	18.653	19.587	4.53517	110.7	2.17	18.8663	53.0045	1.27569	0.75	0.85	0.78	0.793333	66.8125	51.0138
W-19+W	Introduced	Australia	Wairo beach	W19	3	3	336	101	0.300595	28.2757	17.434	15.099	15.987	4.11427	127.3	1.93	13.6952	73.0182	1.13657	0.97	1.2	0.99	1.05333	69.3211	65.9585
W-20+A	Introduced	Australia	Wairo beach	W20	3	3	331	113	0.34139		16.46	14.803	16.427	4.26956	104.8	1.78	15.7061	63.6695	1.19607	0.96	1.04	0.93	0.976667	65.1906	58.8764
W-20+W	Introduced	Australia	Wairo beach	W20	3	3	287	143	0.498258		15.306	13.398	15.233	4.16165	99.3	1.59	15.4139	64.8765	1.18791	0.9	1.01	0.92	0.943333	68.7737	62.4528
W-21+A	Introduced	Australia	Wairo beach	W21	3	3	338	62	0.183432		18.284	15.857	17.895	4.49388	92.3	2.11	19.8093	50.4813	1.29687	1.04	1.21	0.91	1.05333	47.9253	43.7441
W-21+W	Introduced	Australia	Wairo beach	W21	3	3	392	123	0.313776	35.2918	21.646	19.25	18.607	4.24093	111.6	2.37	19.3961	51.5569	1.28771	0.85	0.84	0.78	0.823333	62.6197	47.0886
W-22+A	Introduced	Australia	Wairo beach	W22	3	3	327	120	0.366972		13.143	10.879	15.162	4.59687	68.2	1.53	19.2713	51.8907	1.28491	0.65	0.76	0.65	0.686667	75.569	44.5752
W-22+W	Introduced	Australia	Wairo beach	W22	3	3	398	90	0.226131	24.5273	19.523	16.823	18.051	4.40098	107.7	2.15	18.1272	55.1657	1.25833	0.7	0.8	0.71	0.736667	74.8856	50.093
W-23+A	Introduced	Australia	Wairo beach	W23	3	3	346	173	0.5		28.495	26.408	24.536	4.77459	148.8	3.08	19.1499	52.2197	1.28217	0.64	0.92	0.62	0.726667	71.862	48.3117
W-23+W	Introduced	Australia	Wairo beach	W23	3	3	356	118	0.331461		27.723	24.668	23.018	4.63448	133	3.07	20.8444	47.9746	1.31899	0.68	0.92	0.65	0.75	63.9661	43.3225
W-24+A	Introduced	Australia	Wairo beach	W24	3	3					21.993	18.33	19.776	4.6191	112	2.72	19.6366	50.9253	1.29307	0.72	0.79	0.58	0.696667	73.0985	41.1765
W-24+W	Introduced	Australia	Wairo beach	W24	3	3				14.4093	20.014	16.941	19.154	4.65361	105.2	2.28	19.0247	52.5632	1.27932	0.78	0.88	0.79	0.816667	64.3631	46.1404
W-25+A	Introduced	Australia	Wairo beach	W25	3	3	279	37	0.132616		11.074	8.663	12.927	4.39201	50.5	1.31	21.9287	45.6023	1.34101	0.76	0.86	0.82	0.813333	56.0684	38.5496
W-25+W	Introduced	Australia	Wairo beach	W25	3	3	311	51	0.163987		12.892	11.074	14.283	4.29207	71.8	1.43	17.9554	55.6935	1.2542	0.97	0.97	0.84	0.926667	60.1008	50.2098
W-27+W	Introduced	Australia	Wairo beach	W27	3	3	279	46	0.164875	12.2759	10.723	9.03	14.124	4.70017	42.4	1.03	25.2901	39.5412	1.40295	0.82	0.82	0.78	0.806667	49.018	41.165
W-28+W	Introduced	Australia	Wairo beach	W28	3	3	402	172	0.427861		17.897	15.862	18.475	4.6388	81.9	1.83	21.8523	45.7619	1.3395	0.6	0.63	0.65	0.626667	73.0242	44.7541
W-29+W	Introduced	Australia	Wairo beach	W29	3	3	423	122	0.288416	20.3966	21.536	19.489	19.095	4.32539	128.9	2.25	16.7075	59.8533	1.22291	0.75	0.97	0.74	0.82	72.9918	57.2889
W-30+W	Introduced	Australia	Wairo beach	W30	3	3	373	154	0.412869		27.039	23.841	21.939	4.49319	163.6	3.07	16.5275	60.5052	1.21821	0.82	0.91	0.7	0.81	74.6978	53.2899
W-31+W	Introduced	Australia	Wairo beach	W31	3	3	362	59	0.162983	22.5778	19.535	17.325	18.151	4.36078	106.5	2.03	18.3427	54.5175	1.26346	0.71	0.81	0.81	0.776667	70.1942	52.4631
W-32+W	Introduced	Australia	Wairo beach	W32	3	3	412	103	0.25		21.585	18.05	18.754	4.41423	101	2.7	21.3713	46.7918	1.32983	0.73	0.97	0.74	0.813333	57.5308	37.4074
W-33+W	Introduced	Australia	Wairo beach	W33	3	3	316	73	0.231013		10.442	9.134	14.072	4.65613	51.7	1	20.1973	49.5116	1.30529	0.64	0.66	0.73	0.676667	73.1698	51.7
W-35+W	Introduced	Australia	Wairo beach	W35	3	3	337	122	0.362018		18.139	15.556	17.295	4.38502	77.3	2.22	23.4657	42.6154	1.37043	0.84	0.74	0.76	0.78	54.6351	34.8198
W-38+W	Introduced	Australia	Wairo beach	W38	3	3	383	119	0.310705	28.2859	32.619	28.398	22.523	4.22651	193.6	4.02	16.8487	59.3519	1.22657	0.94	1.06	0.84	0.946667	62.6957	48.1592
N-1+A	Introduced	Australia	Narooma	N1	4	4	256	39	0.152344		9.604	8.164	12.492	4.372	61	0.96	15.7443	63.5152	1.19712	0.79	0.98	0.82	0.863333	73.5697	63.5417
N-1+L	Introduced	Australia	Narooma	N1	4	4	435	92	0.211494		34.336	30.735	26.344	4.75188	209.5	4.34	16.3895	61.0147	1.21457	0.65	0.91	0.64	0.733333	83.2018	48.2719
N-1+M	Introduced	Australia	Narooma	N1	4	4	401	81	0.201995		18.353	16.306	17.153	4.24782	85.4	2	21.4906	46.5319	1.33225	0.74	0.84	0.81	0.796667	58.4082	42.7
N-1+N	Introduced	Australia	Narooma	N1	4	4	449	195	0.434298	29.158	25.266	22.32	19.818	4.19481	159.5	3.06	15.8408	63.1283	1.19978	0.81	0.88	0.79	0.826667	76.3649	52.1242
N-1+W	Introduced	Australia	Narooma	N1	4	4	354	33	0.0932203		13.068	11.758	15.956	4.65326	55.7	1.21	23.4614	42.6232	1.37035	0.78	0.89	0.72	0.796667	53.5019	46.0331
N-3+A	Introduced	Australia	Narooma	N3	4	4	391	96	0.245524		23.621	21.125	19.606	4.2657	141.4	2.46	16.7051	59.862	1.22285	0.76	0.9	0.74	0.8	74.8275	57.4797
N-3+L	Introduced	Australia	Narooma	N3	4	4	431	52	0.12065		24.926	21.009	21.722	4.73911	190.1	3.1	13.112	76.2657	1.11767	0.75	0.92	0.75	0.806667	94.5443	61.3226
N-3+M	Introduced	Australia	Narooma	N3	4	4	388	139	0.358247		29.608	25.53	21.975	4.34914	166	3.58	17.8361	56.0659	1.2513	0.84	0.89	0.83	0.853333	65.7023	46.3687
N-3+N	Introduced	Australia	Narooma	N3	4	4	337	210	0.623145	32.8886	31.201	27.469	22.992	4.38688	217.6	4.02	14.3387	69.7414	1.15651	0.77	0.75	0.8	0.773333	90.1828	54.1294
N-3+W	Introduced	Australia	Narooma	N3	4	4	366	73	0.199454		11.709	10.153	15.018	4.71319	48.2	1.57	24.2925	41.1649	1.38547	0.75	0.93	0.7	0.793333	51.8885	30.7006
N-8+A	Introduced	Australia	Narooma	N8	4	4	324	105	0.324074		15.45	13.188	15.519	4.27341	96.5	1.72	16.0104	62.4595	1.2044	0.9	0.98	0.86	0.913333	68.3864	56.1047
N-8+L	Introduced	Australia	Narooma	N8	4	4	248	38	0.153226		7.401	6.328	11.457	4.55447	34.7	0.66	21.3285	46.8856	1.32896	0.82	0.94	0.79	0.85	55.1595	52.5758
N-8+M	Introduced	Australia	Narooma	N8	4	4	419	71	0.169451		21.16	18.266	18.768	4.39133	89.4	2.43	23.6689	42.2495	1.37418	0.64	0.72	0.68	0.68	62.1317	36.7901
N-8+N	Introduced	Australia	Narooma	N8	4	4	491	135	0.274949	32.134	29.195	25.465	21.783	4.31664	197.6	3.4	14.7748	67.6828	1.16952	0.81	1.03	0.79	0.876667	77.2047	58.1176
N-8+W	Introduced	Australia	Narooma	N8	4	4	355	167	0.470423		29.678	26.955	23.176	4.46394	157.4	3.3	18.8551	53.0359	1.27543	0.66	0.75	0.7	0.703333	75.4065	47.697
N-9+A	Introduced	Australia	Narooma	N9	4	4	322	91	0.282609		10.214	8.407	13.39	4.61807	41.4	0.96	24.6715	40.5326	1.3922	0.69	0.72	0.58	0.663333	61.1044	43.125
N-9+L	Introduced	Australia	Narooma	N9	4	4	390	66	0.169231		18.044	15.901	17.577	4.40791	89.5	1.64	20.1609	49.601	1.30451	0.62	0.74	0.64	0.666667	74.4015	54.5732
N-9+M	Introduced	Australia	Narooma	N9	4	4	366	71	0.193989		15.965	13.147	15.715	4.33412	79.8	1.66	20.0063	49.9843	1.30117	0.82	0.85	0.87	0.846667	59.0366	48.0723
N-9+N	Introduced	Australia	Narooma	N9	4	4	265	43	0.162264	10.0078	10.693	8.759	13.789	4.65914	42.5	1.15	25.16	39.7456	1.40071	0.82	0.92	0.76	0.833333	47.6948	36.9565
N-9+W	Introduced	Australia	Narooma	N9	4	4	434	140	0.322581		34.153	30.511	24.52	4.43907	190.3	3.84	17.9469	55.7198	1.25399	0.75	0.94	0.64	0.776667	71.7423	49.5573
N-13+A	Introduced	Australia	Narooma	N13	4	4	493	151	0.306288		25.311	23.046	20.872	4.34777	147.6	2.55	17.1484	58.3146	1.23422	0.56	0.74	0.6	0.633333	92.0756	57.8824
N-13+L	Introduced	Australia	Narooma	N13	4	4	447	91	0.203579		26.24	23.237	20.742	4.30289	127.8	3.11	20.5321	48.7043	1.31243	0.76	0.99	0.76	0.836667	58.2123	41.0932
N-13+M	Introduced	Australia	Narooma	N13	4	4	386	192	0.497409		25.841	23.179	19.837	4.1203	163.3	2.55	15.8242	63.1941	1.19932	0.7	0.79	0.86	0.783333	80.6734	64.0392
N-13+N	Introduced	Australia	Narooma	N13	4	4	387	120	0.310078		26.257	23.676	20.648	4.2435	161.6	2.7	16.2481	61.5455	1.2108	0.7	0.77	0.65	0.706667	87.0927	59.8519
N-13+W	Introduced	Australia	Narooma	N13	4	4	395	160	0.405063		26.783	24.196	21.915	4.45523	139.4	2.83	19.2131	52.0479	1.2836	0.87	0.86	0.78	0.836667	62.2087	49.258
N-14+A	Introduced	Australia	Narooma	N14	4	4	473	141	0.298097		32.669	29.362	23.686	4.37118	183.7	3.74	17.7839	56.2307	1.25003	0.68	0.78	0.7	0.72	78.0982	49.1176
N-14+N	Introduced	Australia	Narooma	N14	4	4	360	164	0.455556	38.0282	26.99	23.501	21.36	4.40614	175.5	2.93	15.3789	65.0241	1.18693	0.64	0.65	0.65	0.646667	100.553	59.8976
N-17+A	Introduced	Australia	Narooma	N17	4	4	350	135	0.385714		14.315	12.929	15.338	4.26566	65.1	1.42	21.9892	45.4768	1.34221	0.74	0.8	0.82	0.786667	57.8095	45.8451
N-17+N	Introduced	Australia	Narooma	N17	4	4	333	117	0.351351	25.6873	30.19	26.617	22.298	4.32202	171.9	3.76	17.5625	56.9394	1.24459	0.88	1.01	0.85	0.913333	62.3424	45.7181
N-20+A	Introduced	Australia	Narooma	N20	4	4	371	144	0.38814		28.716	26.752	22.136	4.27978	176.4	3.3	16.2789	61.4292	1.21163	0.82	0.97	0.75	0.846667	72.5541	53.4545
N-20+N	Introduced	Australia	Narooma	N20	4	4	355	142	0.4		21.285	18.487	18.021	4.19127	138.8	2.39	15.335	65.2102	1.18568	0.85	0.98	0.85	0.893333	72.9965	58.0753
N-21+A	Introduced	Australia	Narooma	N21	4	4	446	139	0.311659		27.127	24.306	21.252	4.31065	142.3	2.89	19.0632	52.457	1.2802	0.73	0.81	0.71	0.75	69.9426	49.2388
N-21+N	Introduced	Australia	Narooma	N21	4	4	430	165	0.383721		24.135	21.103	21.531	4.68697	116.7	2.39	20.6812	48.353	1.31558	0.51	0.77	0.65	0.643333	75.1601	48.8285
N-22+A	Introduced	Australia	Narooma	N22	4	4	303	156	0.514851		11.627	10.402	14.161	4.39072	59.6	1.18	19.5084	51.26	1.29022	0.73	0.77	0.77	0.756667	67.7445	50.5085
N-22+N	Introduced	Australia	Narooma	N22	4	4	358	56	0.156425	17.4513	14.232	12.228	15.415	4.40825	71.1	1.51	20.0169	49.9578	1.3014	0.82	0.97	0.88	0.89	56.1324	47.0861
N-23+A	Introduced	Australia	Narooma	N23	4	4	360	91	0.252778		21.313	18.946	18.493	4.24863	129.7	2.28	16.4325	60.8549	1.2157	0.81	0.84	0.83	0.826667	73.6148	56.886
N-23+N	Introduced	Australia	Narooma	N23	4	4	405	46	0.11358		33.146	29.842	24.154	4.42156	221.4	3.97	14.9711	66.7954	1.17525	0.81	0.98	0.83	0.873333	76.4833	55.7683
N-24+A	Introduced	Australia	Narooma	N24	4	4	390	111	0.284615		19.74	18.057	18.449	4.3416	111.4	2.08	17.7199	56.4336	1.24846	0.8	0.99	0.84	0.876667	64.373	53.5577
N-24+N	Introduced	Australia	Narooma	N24	4	4	450	125	0.277778		20.367	18.317	18.196	4.25156	107.4	2.14	18.9637	52.7324	1.27792	0.72	0.9	0.75	0.79	66.7498	50.1869
M-1+A	Introduced	Australia	Mallacoota	M1	5	5	380	190	0.5		26.62	23.177	20.549	4.26837	214.2	3.27	12.4276	80.4658	1.09439	0.89	0.95	0.88	0.906667	88.7491	65.5046
M-1+L	Introduced	Australia	Mallacoota	M1	5	5	419	180	0.429594		30.47	27.137	24.355	4.67528	199.5	3.6	15.2732	65.4742	1.18393	0.76	0.82	0.86	0.813333	80.5011	55.4167
M-1+M	Introduced	Australia	Mallacoota	M1	5	5	375	190	0.506667		20.433	18.752	19.21	4.43612	118.3	1.99	17.2722	57.8965	1.23735	0.62	0.81	0.66	0.696667	83.1051	59.4472
M-1+N	Introduced	Australia	Mallacoota	M1	5	5	260	51	0.196154		19.279	16.476	18.291	4.50621	85	1.95	22.6812	44.0894	1.35567	0.74	0.76	0.73	0.743333	59.3131	43.5897
M-1+W	Introduced	Australia	Mallacoota	M1	5	5	374	156	0.417112		27.088	23.423	22.399	4.62815	166.6	3.06	16.2593	61.5032	1.2111	0.75	0.74	0.7	0.73	84.251	54.4444
M-4+A	Introduced	Australia	Mallacoota	M4	5	5	296	191	0.64527		24.452	21.66	19.348	4.15726	183	2.81	13.3617	74.8405	1.12586	0.68	0.83	0.73	0.746667	100.233	65.1246
M-4+L	Introduced	Australia	Mallacoota	M4	5	5	455	123	0.27033		24.394	21.889	21.802	4.65997	136.5	2.73	17.8711	55.9564	1.25215	0.78	0.9	0.78	0.82	68.2395	50
M-4+M	Introduced	Australia	Mallacoota	M4	5	5	396	126	0.318182		29.406	26.015	22.801	4.47035	148.5	3.6	19.802	50.4999	1.29671	0.82	0.91	0.79	0.84	60.1189	41.25
M-4+N	Introduced	Australia	Mallacoota	M4	5	5	380	102	0.268421		22.561	20.259	19.427	4.31615	135.4	2.42	16.6625	60.0151	1.22174	0.74	0.87	0.77	0.793333	75.6492	55.9504
M-4+W	Introduced	Australia	Mallacoota	M4	5	5	483	137	0.283644		17.527	14.881	17.607	4.56425	92.4	1.9	18.9686	52.7187	1.27804	0.63	0.73	0.64	0.666667	79.078	48.6316
M-5+A	Introduced	Australia	Mallacoota	M5	5	5	169	28	0.16568		3.698	2.891	7.641	4.49393	15	0.3	24.6533	40.5625	1.39188	0.84	0.98	0.86	0.893333	45.4057	50
M-5+L	Introduced	Australia	Mallacoota	M5	5	5	380	181	0.476316		25.122	21.559	19.462	4.19154	202.5	2.91	12.4059	80.6066	1.09363	0.86	0.95	0.85	0.886667	90.9097	69.5876
M-5+M	Introduced	Australia	Mallacoota	M5	5	5	424	126	0.29717		26.6	24.654	22.486	4.52865	141.4	2.95	18.8119	53.1579	1.27443	0.72	0.83	0.8	0.783333	67.8611	47.9322
M-5+N	Introduced	Australia	Mallacoota	M5	5	5	370	156	0.421622		20.177	17.416	17.792	4.26335	106.7	2.13	18.91	52.882	1.27669	0.83	0.94	0.75	0.84	62.9548	50.0939
M-5+W	Introduced	Australia	Mallacoota	M5	5	5	375	214	0.570667		15.327	13.262	17.057	4.6838	88.7	1.49	17.2796	57.8717	1.23753	0.69	0.79	0.69	0.723333	80.007	59.5302
M-6+A	Introduced	Australia	Mallacoota	M6	5	5	336	125	0.372024		28.719	25.255	23.693	4.71462	141.9	3.34	20.2389	49.4098	1.30619	0.78	0.88	0.78	0.813333	60.7498	42.485
M-6+L	Introduced	Australia	Mallacoota	M6	5	5	406	175	0.431034		23.178	20.615	20.008	4.40669	117.5	2.42	19.726	50.6946	1.29504	0.7	0.83	0.75	0.76	66.7035	48.5537
M-6+M	Introduced	Australia	Mallacoota	M6	5	5	374	163	0.435829		18.52	15.008	17.888	4.61743	132.7	2.18	13.9563	71.6523	1.14477	0.9	0.94	0.86	0.9	79.6136	60.8716
M-6+N	Introduced	Australia	Mallacoota	M6	5	5	310	85	0.274194		15.184	13.256	16.658	4.57527	67.1	1.54	22.6289	44.1913	1.35466	0.82	0.85	0.84	0.836667	52.8182	43.5714
M-6+W	Introduced	Australia	Mallacoota	M6	5	5	395	140	0.35443		28.684	26.143	23.71	4.63718	160.2	3.04	17.9051	55.85	1.25298	0.77	0.77	0.71	0.75	74.4666	52.6974
M-8+A	Introduced	Australia	Mallacoota	M8	5	5	376	185	0.492021		24.011	21.1	21.419	4.66292	137.5	3.1	17.4625	57.2654	1.24211	0.77	0.85	0.76	0.793333	72.1833	44.3548
M-8+L	Introduced	Australia	Mallacoota	M8	5	5	414	242	0.584541		21.937	19.857	18.825	4.22453	134	2.03	16.3709	61.084	1.21407	0.72	0.84	0.72	0.76	80.3737	66.0099
M-8+M	Introduced	Australia	Mallacoota	M8	5	5	361	205	0.567867		21.415	18.879	18.671	4.29713	133.5	2.16	16.0412	62.3395	1.20524	0.82	0.86	0.72	0.8	77.9244	61.8056
M-8+N	Introduced	Australia	Mallacoota	M8	5	5	351	178	0.507123		21.59	19.945	19.496	4.36544	137.1	2.12	15.7476	63.5016	1.19722	0.65	0.91	0.79	0.783333	81.0659	64.6698
M-8+W	Introduced	Australia	Mallacoota	M8	5	5	239	99	0.414226		19.235	15.354	17.008	4.34053	122.1	2.37	15.7535	63.478	1.19738	1.07	1.3	1.18	1.18333	53.6434	51.519
M-11+A	Introduced	Australia	Mallacoota	M11	5	5	341	113	0.331378		13.817	12.202	16.083	4.60417	68	1.49	20.3191	49.2147	1.3079	0.74	1.05	0.83	0.873333	56.3528	45.6376
M-11+M	Introduced	Australia	Mallacoota	M11	5	5	409	194	0.474328		24.663	21.777	20.952	4.48979	144.8	2.5	17.0325	58.7114	1.23128	0.65	0.86	0.65	0.72	81.5437	57.92
M-12+A	Introduced	Australia	Mallacoota	M12	5	5	332	159	0.478916		24.533	20.187	20.144	4.48342	182.1	2.93	13.4723	74.2266	1.12944	0.77	0.92	0.78	0.823333	90.1537	62.1502
M-12+M	Introduced	Australia	Mallacoota	M12	5	5	315	52	0.165079	14.4808	13.395	12.123	15.476	4.44481	94	1.41	14.25	70.1754	1.15381	0.83	0.95	0.8	0.86	81.5993	66.6667
M-13+A	Introduced	Australia	Mallacoota	M13	5	5	414	164	0.396135		19.969	18.929	17.825	4.097	120	1.84	16.6408	60.0931	1.22118	0.82	0.82	0.76	0.8	75.1164	65.2174
M-13+M	Introduced	Australia	Mallacoota	M13	5	5	451	132	0.292683		22.873	21.041	19.635	4.28053	111.5	1.95	20.5139	48.7474	1.31205	0.76	0.75	0.68	0.73	66.7773	57.1795
M-14+A	Introduced	Australia	Mallacoota	M14	5	5	371	200	0.539084		34.631	29.574	25.091	4.61384	219.8	4.02	15.7557	63.4691	1.19744	0.72	0.86	0.75	0.776667	81.7199	54.6766
M-14+M	Introduced	Australia	Mallacoota	M14	5	5	460	134	0.291304		23.216	19.154	22.013	5.02979	91	2.48	25.5121	39.1971	1.40675	0.42	0.55	0.43	0.466667	83.9938	36.6935
M-17+A	Introduced	Australia	Mallacoota	M17	5	5	441	116	0.263039		20.959	17.85	18.42	4.35984	105	2.16	19.961	50.0978	1.30018	0.69	0.69	0.65	0.676667	74.0362	48.6111
M-17+M	Introduced	Australia	Mallacoota	M17	5	5	255	90	0.352941	27.1776	10.602	9.172	14.439	4.76766	39.4	1.12	26.9086	37.1628	1.42989	0.65	0.78	0.6	0.676667	54.9204	35.1786
M-18+A	Introduced	Australia	Mallacoota	M18	5	5	420	165	0.392857		17.032	15.414	17.216	4.38505	82.2	1.67	20.7202	48.2621	1.31639	0.68	0.86	0.68	0.74	65.219	49.2216
M-18+M	Introduced	Australia	Mallacoota	M18	5	5	415	126	0.303614	22.5149	27.064	23.945	21.811	4.45726	132.1	3.24	20.4875	48.8102	1.31149	0.8	0.98	0.82	0.866667	56.3195	40.7716
M-19+A	Introduced	Australia	Mallacoota	M19	5	5	311	71	0.228296		9.266	8.308	13.593	4.71593	40.5	0.77	22.879	43.7082	1.35944	0.61	0.68	0.59	0.626667	69.7471	52.5974
M-19+M	Introduced	Australia	Mallacoota	M19	5	5	400	90	0.225	29.5944	26.809	24.19	22.736	4.6227	186.9	2.93	14.344	69.7154	1.15667	0.64	0.74	0.71	0.696667	100.07	63.7884
M-20+A	Introduced	Australia	Mallacoota	M20	5	5	374	201	0.537433		26.043	22.68	20.795	4.36654	181.2	2.91	14.3725	69.5772	1.15753	0.87	1.01	0.86	0.913333	76.1795	62.268
M-20+M	Introduced	Australia	Mallacoota	M20	5	5	441	75	0.170068		29.433	26.076	24.385	4.77532	169.2	3.09	17.3954	57.4865	1.24043	0.68	0.75	0.65	0.693333	82.9132	54.7573
M-21+A	Introduced	Australia	Mallacoota	M21	5	5	434	96	0.221198						74.5	1.95				0.82	0.97	0.79	0.86		38.2051	split leaf - removed area and perim measurements
M-21+M	Introduced	Australia	Mallacoota	M21	5	5	355	177	0.498592	37.3915	26.426	22.549	20.155	4.24443	186.4	3.23	14.177	70.5366	1.15159	0.76	0.79	0.75	0.766667	92.0043	57.709
M-24+A	Introduced	Australia	Mallacoota	M24	5	5	227	96	0.422907		9.372	8.325	13.22	4.58183	42.9	0.93	21.8462	45.7746	1.33937	0.81	0.9	0.87	0.86	53.2263	46.129
M-24+M	Introduced	Australia	Mallacoota	M24	5	5	174	117	0.672414		15.806	13.495	17.095	4.65353	70	1.59	22.58	44.287	1.35372	0.76	0.94	0.68	0.793333	55.8239	44.0252
M-25+A	Introduced	Australia	Mallacoota	M25	5	5	412	119	0.288835		21.212	19.777	18.847	4.23801	119.2	1.99	17.7953	56.1946	1.25031	0.68	0.8	0.68	0.72	78.0481	59.8995
M-25+M	Introduced	Australia	Mallacoota	M25	5	5	377	108	0.286472	24.4421	15.252	13.655	16.207	4.38588	104	1.47	14.6654	68.1878	1.16629	0.72	0.81	0.72	0.75	90.917	70.7483
M-26+A	Introduced	Australia	Mallacoota	M26	5	5	399	223	0.558897		25.824	21.424	20.115	4.3458	190.7	3.17	13.5417	73.846	1.13167	0.98	0.97	0.8	0.916667	80.5593	60.1577
M-26+M	Introduced	Australia	Mallacoota	M26	5	5	398	160	0.40201		16.687	16.025	16.583	4.14251	118.7	1.73	14.0581	71.1332	1.14793	0.94	1.12	0.91	0.99	71.8517	68.6127
M-27+A	Introduced	Australia	Mallacoota	M27	5	5	415	182	0.438554		18.742	16.837	17.48	4.25999	113.7	1.82	16.4837	60.6659	1.21706	0.66	0.88	0.66	0.733333	82.7262	62.4725
M-27+M	Introduced	Australia	Mallacoota	M27	5	5	287	9	0.0313589	17.8443	7.35	6.639	11.955	4.63979	42.4	0.68	17.3349	57.6871	1.23892	0.79	1.02	0.85	0.886667	65.0606	62.3529
M-28+A	Introduced	Australia	Mallacoota	M28	5	5	402	90	0.223881		16.463	13.831	16.882	4.53939	74.2	1.93	22.1873	45.0708	1.34611	0.78	0.88	0.8	0.82	54.9643	38.4456
M-28+M	Introduced	Australia	Mallacoota	M28	5	5	441	121	0.274376	36.1806	25.14	23.586	20.395	4.19949	151	2.52	16.649	60.0636	1.22139	0.65	0.75	0.7	0.7	85.8052	59.9206
M-29+A	Introduced	Australia	Mallacoota	M29	5	5	388	101	0.260309		33.103	27.68	26.36	5.01028	136.9	4.19	24.1804	41.3558	1.38346	0.63	0.76	0.54	0.643333	64.2836	32.673
M-29+M	Introduced	Australia	Mallacoota	M29	5	5	405	180	0.444444		29.223	25.171	22.588	4.50223	184.9	3.4	15.8048	63.2721	1.19879	0.68	0.85	0.71	0.746667	84.7394	54.3824
M-30+A	Introduced	Australia	Mallacoota	M30	5	5	361	95	0.263158		19.765	17.646	18.497	4.4033	103.7	1.99	19.0598	52.4665	1.28012	0.72	0.75	0.69	0.72	72.8701	52.1106
M-30+M	Introduced	Australia	Mallacoota	M30	5	5	397	83	0.209068		12.53	11.022	14.659	4.41544	67.9	1.24	18.4536	54.1899	1.26608	0.65	0.72	0.67	0.68	79.6911	54.7581
M-31+A	Introduced	Australia	Mallacoota	M31	5	5	253	128	0.505929		9.6	8.207	12.933	4.51447	52.9	1	18.1474	55.1042	1.25882	0.8	0.89	0.77	0.82	67.2002	52.9
M-31+M	Introduced	Australia	Mallacoota	M31	5	5	430	124	0.288372		16.574	14.006	16.173	4.32149	89.6	1.95	18.4978	54.0606	1.26712	0.82	0.86	0.78	0.82	65.9275	45.9487
M-32+M	Introduced	Australia	Mallacoota	M32	5	5	398	130	0.326633	26.3148	24.007	20.313	19.999	4.43733	134.3	2.74	17.8757	55.942	1.25226	0.76	0.95	0.73	0.813333	68.7812	49.0146
M-34+M	Introduced	Australia	Mallacoota	M34	5	5	326	111	0.340491	27.39	23.778	20.184	21.076	4.69121	144.2	2.91	16.4896	60.6443	1.21721	0.84	0.98	0.8	0.873333	69.44	49.5533
M-36+M	Introduced	Australia	Mallacoota	M36	5	5	275	31	0.112727	9.9604	6.695	5.423	10.672	4.58275	47.4	1.04	14.1245	70.7991	1.14997	0.72	0.89	0.81	0.806667	87.7675	45.5769
M-37+M	Introduced	Australia	Mallacoota	M37	5	5	491	93	0.189409		21.741	18.904	19.029	4.37662	103.4	2.14	21.0261	47.5599	1.32276	0.65	0.83	0.62	0.7	67.9427	48.3178
M-38+M	Introduced	Australia	Mallacoota	M38	5	5	484	193	0.39876		37.683	32.135	26.292	4.63804	245.9	5.47	15.3245	65.2549	1.18539	0.72	0.85	0.78	0.783333	83.3041	44.9543
M-39+M	Introduced	Australia	Mallacoota	M39	5	5	401	147	0.366584		33.261	30.581	23.859	4.31446	209.7	3.99	15.8612	63.0468	1.20034	0.6	0.89	0.62	0.703333	89.64	52.5564
M-40+M	Introduced	Australia	Mallacoota	M40	5	5	492	81	0.164634	27.7218	19.305	16.644	17.532	4.29737	110.8	2.11	17.4233	57.3945	1.24113	0.73	0.72	0.72	0.723333	79.3472	52.5118
M-41+M	Introduced	Australia	Mallacoota	M41	5	5	451	64	0.141907		23.138	19.541	20.865	4.72003	127.5	2.44	18.1475	55.1042	1.25882	0.6	0.96	0.82	0.793333	69.459	52.2541
M-42+M	Introduced	Australia	Mallacoota	M42	5	5	351	195	0.555556		18.09	14.805	16.857	4.38103	157.1	2.06	11.515	86.8436	1.06126	0.89	0.96	0.85	0.9	96.4928	76.2621
M-43+M	Introduced	Australia	Mallacoota	M43	5	5	270	15	0.0555556		6.205	5.417	11.012	4.73137	30.7	0.53	20.2117	49.4762	1.3056	0.7	0.89	0.79	0.793333	62.365	57.9245
M-45+M	Introduced	Australia	Mallacoota	M45	5	5	306	133	0.434641	26.7034	17.085	14.986	16.664	4.30464	108.4	1.86	15.7611	63.4475	1.19759	0.72	0.84	0.77	0.776667	81.692	58.2796

## Sheet: 2 traits small pots
Plant Indivual ID	Population type	Country name	Population name	Maternal line ID	All popn code Arniston = 1 Treachery = 2 Wairo = 3 Mallacoota = 4 Narooma = 5	Aus popn code Treachery = 2 Wairo = 3 Mallacoota = 4 Narooma = 5	Above-ground biomass at 12 weeks (g)	Below-ground biomass at 12 weeks (g)	Total biomass (g)	Percent biomass above ground	Percent biomass below ground	Root:shoot ratio	RMF
A-5b	Source	South Africa	Arniston	5	1		0.751	0.31	1.061	70.7823	29.2177	0.412783	0.292177
A-7	Source	South Africa	Arniston	7	1		1.288	0.561	1.849	69.6593	30.3407	0.435559	0.303407
A-8	Source	South Africa	Arniston	8	1		1.341	1.152	2.493	53.7906	46.2094	0.85906	0.462094
A-9	Source	South Africa	Arniston	9	1		0.288	0.219	0.507	56.8047	43.1953	0.760417	0.431953
A-11	Source	South Africa	Arniston	11	1		0.275	0.401	0.676	40.6805	59.3195	1.45818	0.593195
A-13	Source	South Africa	Arniston	13	1		0.754	0.283	1.037	72.7097	27.2903	0.375332	0.272903
A-15	Source	South Africa	Arniston	15	1		1.358	0.99	2.348	57.8365	42.1635	0.729013	0.421635
A-17	Source	South Africa	Arniston	17	1		1.586	0.664	2.25	70.4889	29.5111	0.418663	0.295111
A-18b	Source	South Africa	Arniston	18	1		1.233	0.856	2.089	59.0235	40.9765	0.694242	0.409765
A-19	Source	South Africa	Arniston	19	1		1.787	0.655	2.442	73.1777	26.8223	0.366536	0.268223
A-23	Source	South Africa	Arniston	23	1		0.432	0.188	0.62	69.6774	30.3226	0.435185	0.303226
A-24	Source	South Africa	Arniston	24	1		1.041	0.654	1.695	61.4159	38.5841	0.628242	0.385841
A-37	Source	South Africa	Arniston	37	1		0.718	0.379	1.097	65.4512	34.5488	0.527855	0.345488
A-39	Source	South Africa	Arniston	39	1		0.678	0.422	1.1	61.6364	38.3636	0.622419	0.383636
A-48	Source	South Africa	Arniston	48	1		0.4	0.206	0.606	66.0066	33.9934	0.515	0.339934
A-49	Source	South Africa	Arniston	49	1		1.411	1.522	2.933	48.1077	51.8923	1.07867	0.518923
A-50	Source	South Africa	Arniston	50	1		1.567	1.325	2.892	54.184	45.816	0.845565	0.45816
C-9	Source	South Africa	Arniston	C9	1		0.696	0.369	1.065	65.3521	34.6479	0.530172	0.346479
C-18	Source	South Africa	Arniston	C18	1		0.908	0.404	1.312	69.2073	30.7927	0.444934	0.307927
C-26b	Source	South Africa	Arniston	C26	1		1.66	0.317	1.977	83.9656	16.0344	0.190964	0.160344
C-27	Source	South Africa	Arniston	C27	1		0.48	0.197	0.677	70.901	29.099	0.410417	0.29099
L-1	Introduced	Australia	Treachery beach	1	2	2	1.752	0.283	2.035	86.0934	13.9066	0.16153	0.139066
L-4	Introduced	Australia	Treachery beach	4	2	2	1.452	0.28	1.732	83.8337	16.1663	0.192837	0.161663
L-5	Introduced	Australia	Treachery beach	5	2	2	1.093	0.227	1.32	82.803	17.197	0.207685	0.17197
L-6	Introduced	Australia	Treachery beach	6	2	2	1.224	0.571	1.795	68.1894	31.8106	0.466503	0.318106
L-7	Introduced	Australia	Treachery beach	7	2	2	1.326	0.267	1.593	83.2392	16.7608	0.201357	0.167608
L-8	Introduced	Australia	Treachery beach	8	2	2	1.025	0.335	1.36	75.3676	24.6324	0.326829	0.246324
L-11	Introduced	Australia	Treachery beach	11	2	2	0.62	0.154	0.774	80.1034	19.8966	0.248387	0.198966
L-12	Introduced	Australia	Treachery beach	12	2	2	0.749	0.336	1.085	69.0323	30.9677	0.448598	0.309677
L-13	Introduced	Australia	Treachery beach	13	2	2	0.775	0.194	0.969	79.9794	20.0206	0.250323	0.200206
L-14	Introduced	Australia	Treachery beach	14	2	2	1.248	0.152	1.4	89.1429	10.8571	0.121795	0.108571
L-15	Introduced	Australia	Treachery beach	15	2	2	0.997	0.468	1.465	68.0546	31.9454	0.469408	0.319454
L-16	Introduced	Australia	Treachery beach	16	2	2	0.144	0.057	0.201	71.6418	28.3582	0.395833	0.283582
L-17	Introduced	Australia	Treachery beach	17	2	2	1.479	0.555	2.034	72.7139	27.2861	0.375254	0.272861
W-1	Introduced	Australia	Wairo beach	1	2	2	0.798	0.109	0.907	87.9824	12.0176	0.136591	0.120176
W-2	Introduced	Australia	Wairo beach	2	3	3	1.288	0.247	1.535	83.9088	16.0912	0.19177	0.160912
W-4	Introduced	Australia	Wairo beach	4	3	3	1.215	0.284	1.499	81.054	18.946	0.233745	0.18946
W-5	Introduced	Australia	Wairo beach	5	3	3	1.512	0.511	2.023	74.7405	25.2595	0.337963	0.252595
W-6	Introduced	Australia	Wairo beach	6	3	3	0.918	0.116	1.034	88.7814	11.2186	0.126362	0.112186
W-8	Introduced	Australia	Wairo beach	8	3	3	1.206	0.528	1.734	69.5502	30.4498	0.437811	0.304498
W-9	Introduced	Australia	Wairo beach	9	3	3	1.04	0.208	1.248	83.3333	16.6667	0.2	0.166667
W-10	Introduced	Australia	Wairo beach	10	3	3	1.138	0.314	1.452	78.3747	21.6253	0.275923	0.216253
W-11	Introduced	Australia	Wairo beach	11	3	3	1.026	0.505	1.531	67.015	32.985	0.492203	0.32985
W-14	Introduced	Australia	Wairo beach	14	3	3
W-15	Introduced	Australia	Wairo beach	15	3	3	0.988	0.285	1.273	77.6119	22.3881	0.288462	0.223881
W-16	Introduced	Australia	Wairo beach	16	3	3	0.808	0.168	0.976	82.7869	17.2131	0.207921	0.172131
W-17	Introduced	Australia	Wairo beach	17	3	3	0.787	0.259	1.046	75.239	24.761	0.329098	0.24761
W-18	Introduced	Australia	Wairo beach	18	3	3	2.151	0.792	2.943	73.0887	26.9113	0.368201	0.269113
W-19	Introduced	Australia	Wairo beach	19	3	3	0.821	0.107	0.928	88.4698	11.5302	0.130329	0.115302
W-21	Introduced	Australia	Wairo beach	21	3	3	1.087	0.374	1.461	74.4011	25.5989	0.344066	0.255989
W-22	Introduced	Australia	Wairo beach	22	3	3	1.614	0.848	2.462	65.5565	34.4435	0.525403	0.344435
W-25	Introduced	Australia	Wairo beach	25	3	3	1.051	0.293	1.344	78.1994	21.8006	0.278782	0.218006
W-27	Introduced	Australia	Wairo beach	27	3	3	1.304	0.612	1.916	68.0585	31.9415	0.469325	0.319415
W-29	Introduced	Australia	Wairo beach	29	3	3	0.586	0.25	0.836	70.0957	29.9043	0.426621	0.299043
W-31	Introduced	Australia	Wairo beach	31	3	3	0.551	0.13	0.681	80.9104	19.0896	0.235935	0.190896
W-33	Introduced	Australia	Wairo beach	33	3	3	0.571	0.123	0.694	82.2767	17.7233	0.215412	0.177233
W-38	Introduced	Australia	Wairo beach	38	3	3	1.31	0.272	1.582	82.8066	17.1934	0.207634	0.171934
M-1	Introduced	Australia	Mallacoota	1	4	4	1.253	0.429	1.682	74.4946	25.5054	0.342378	0.255054
M-4	Introduced	Australia	Mallacoota	4	4	4	1.067	0.292	1.359	78.5136	21.4864	0.273664	0.214864
M-5	Introduced	Australia	Mallacoota	5	4	4	0.745	0.228	0.973	76.5673	23.4327	0.30604	0.234327
M-8	Introduced	Australia	Mallacoota	8	4	4	0.803	0.166	0.969	82.8689	17.1311	0.206725	0.171311
M-13	Introduced	Australia	Mallacoota	13	4	4	0.988	0.186	1.174	84.1567	15.8433	0.188259	0.158433
M-14	Introduced	Australia	Mallacoota	14	4	4	1.234	0.181	1.415	87.2085	12.7915	0.146677	0.127915
M-17	Introduced	Australia	Mallacoota	17	4	4	0.738	0.19	0.928	79.5259	20.4741	0.257453	0.204741
M-18	Introduced	Australia	Mallacoota	18	4	4	1.289	0.307	1.596	80.7644	19.2356	0.238169	0.192356
M-19	Introduced	Australia	Mallacoota	19	4	4	1.067	0.166	1.233	86.5369	13.4631	0.155576	0.134631
M-21	Introduced	Australia	Mallacoota	21	4	4	0.699	0.21	0.909	76.8977	23.1023	0.300429	0.231023
M-24	Introduced	Australia	Mallacoota	24	4	4	1.427	0.862	2.289	62.3416	37.6584	0.604064	0.376584
M-25	Introduced	Australia	Mallacoota	25	4	4	0.601	0.284	0.885	67.9096	32.0904	0.472546	0.320904
M-29	Introduced	Australia	Mallacoota	29	4	4	1.006	0.198	1.204	83.5548	16.4452	0.196819	0.164452
M-31	Introduced	Australia	Mallacoota	31	4	4	1.418	0.362	1.78	79.6629	20.3371	0.255289	0.203371
M-32	Introduced	Australia	Mallacoota	32	4	4	0.677	0.241	0.918	73.7473	26.2527	0.355982	0.262527
M-37	Introduced	Australia	Mallacoota	37	4	4	0.771	0.296	1.067	72.2587	27.7413	0.383917	0.277413
M-38	Introduced	Australia	Mallacoota	38	4	4	0.589	0.22	0.809	72.8059	27.1941	0.373514	0.271941
M-39	Introduced	Australia	Mallacoota	39	4	4	1.064	0.323	1.387	76.7123	23.2877	0.303571	0.232877
M-40	Introduced	Australia	Mallacoota	40	4	4	0.918	0.208	1.126	81.5275	18.4725	0.22658	0.184725
M-41	Introduced	Australia	Mallacoota	41	4	4	1.002	0.287	1.289	77.7347	22.2653	0.286427	0.222653
M-43	Introduced	Australia	Mallacoota	43	4	4	1.403	0.322	1.725	81.3333	18.6667	0.229508	0.186667
M-45	Introduced	Australia	Mallacoota	45	4	4	1.204	0.45	1.654	72.7932	27.2068	0.373754	0.272068
N-1	Introduced	Australia	Narooma	1	5	5	0.557	0.14	0.697	79.9139	20.0861	0.251346	0.200861
N-3	Introduced	Australia	Narooma	3	5	5	0.913	0.326	1.239	73.6885	26.3115	0.357065	0.263115
N-8	Introduced	Australia	Narooma	8	5	5	0.975	0.234	1.209	80.6452	19.3548	0.24	0.193548
N-9	Introduced	Australia	Narooma	9	5	5	1.226	0.337	1.563	78.4389	21.5611	0.274878	0.215611
N-13	Introduced	Australia	Narooma	13	5	5	0.611	0.248	0.859	71.1292	28.8708	0.405892	0.288708
N-14	Introduced	Australia	Narooma	14	5	5	1.127	0.283	1.41	79.9291	20.0709	0.251109	0.200709
N-17	Introduced	Australia	Narooma	17	5	5	1.506	0.288	1.794	83.9465	16.0535	0.191235	0.160535
N-20	Introduced	Australia	Narooma	20	5	5	0.768	0.121	0.889	86.3892	13.6108	0.157552	0.136108
N-21	Introduced	Australia	Narooma	21	5	5	1.272	0.407	1.679	75.7594	24.2406	0.319969	0.242406
N-22	Introduced	Australia	Narooma	22	5	5	1.569	0.442	2.011	78.0209	21.9791	0.281708	0.219791
N-23	Introduced	Australia	Narooma	23	5	5	1.32	0.446	1.766	74.7452	25.2548	0.337879	0.252548
N-24	Introduced	Australia	Narooma	24	5	5	1.402	0.929	2.331	60.1459	39.8541	0.662625	0.398541
